# Supplementary material for: The Association between Leptin Level and Breast Cancer: A Meta-Analysis
Source: PLoS One. 2013 Jun 27;8(6):e67349. doi: 10.1371/journal.pone.0067349 (PMC3694967; doi:10.1371/journal.pone.0067349)
Supplement: Text S2 — Calculation formalas for SMD and combined effect () with 95% CI. (DOC) [file pone.0067349.s003.doc]

**1. Combined effect of fixed-effect model**

1. Single study effect

Standardized mean difference (*SMD*)：Because the data retrieved from the literature have different units of measurement, *SMD* was employed in our meta-analysis to compare the effect between control and experimental groups.

1. The formulas for calculating the combined effect () of weight (*w*i), weighted mean () and its standard deviation () are as follows:

1. The 95% confidence interval (95% *CI*) for the combined effect would be computed as:

If “0” is involved in 95% *CI*, it suggests that no statistical significance is found between control and experimental groups.

If “0” is not involved in 95% *CI*, it suggests that statistical difference is existed between control and experimental groups.

1. Z-score for combined effect:

If （=0.05），then reject *H*0, accept *H*1, it should be taken into consideration that the mean of the combined effect size might not equal to 0; if ，then *H*0 is not rejected，it should not be taken into consideration that the mean of the effect size might not equal to 0.

**2. Combined effect of random-effect model**

1. Single study effect: same as fixed-effect model
2. The formulas for calculating combined effect () of weight (), weighted mean () and its standard deviation（）are as follows:

is the within-study variance (random effect).

1. The 95% confidence interval (95% *CI*) for the combined effect （） would be computed as:：
2. Z-score for combined effect:：

If （=0.05），then reject *H*0, accept *H*1, it should be taken into consideration that the mean of the combined effect size might not equal to 0; if ，then *H*0 is not rejected，it should not be taken into consideration that the mean of the effect size might not equal to 0.
